# Supplementary material for: Transcriptomic characterization of the enzymatic antioxidants FeSOD, MnSOD, APX and KatG in the dinoflagellate genus Symbiodinium
Source: PubMed Central journal article supplement (PMC4416395; doi:10.1186/s12862-015-0326-0), 2015-03-18
Supplement: 12862_2015_326_MOESM3_ESM.pdf [file 12862_2015_326_MOESM3_ESM.pdf]

Table S1. “Peroxiscan” classification and BLAST (blastp) results for different *Symbiodinium* peroxidase isoforms (<http://peroxibase.toulouse.inra.fr>).

| Isoform  | Peroxisbase class                        | Top BLAST hit                   | Peroxisbase entry ID | Identity | E-value                                  |
|----------|------------------------------------------|---------------------------------|----------------------|----------|------------------------------------------|
| SymAPX1  | Hybrid ascorbate-cytochrome c peroxidase | <i>Thalassiosira pseudonana</i> | 2557                 | 56-61%   | 10 <sup>-101</sup> to 10 <sup>-107</sup> |
| SymAPX2  | Hybrid ascorbate-cytochrome c peroxidase | <i>Thalassiosira pseudonana</i> | 2557                 | 73-74%   | 10 <sup>-136</sup> to 10 <sup>-142</sup> |
| SymAPX3  | Ascorbate peroxidase                     | <i>Karlodinium micrum</i>       | 3944                 | 72-73%   | 10 <sup>-164</sup> to 10 <sup>-167</sup> |
| SymAPX4  | Ascorbate peroxidase                     | <i>Karlodinium micrum</i>       | 3944                 | 62%      | 10 <sup>-128</sup>                       |
| SymAPX5  | Ascorbate peroxidase                     | <i>Karlodinium micrum</i>       | 3944                 | 56%      | 10 <sup>-116</sup> to 1E <sup>-118</sup> |
| SymAPX6  | Ascorbate peroxidase related             | <i>Thalassiosira pseudonana</i> | 2559                 | 37%      | 10 <sup>-47</sup>                        |
| SymKatG1 | Catalase peroxidase                      | <i>Volvox carteri</i>           | 8373                 | 36%      | 10 <sup>-80</sup>                        |
| SymKatG2 | Catalase peroxidase                      | <i>Karenia brevis</i>           | 2527                 | 53%      | 10 <sup>-153</sup>                       |
