# Supplementary material for: Transcriptomic characterization of the enzymatic antioxidants FeSOD, MnSOD, APX and KatG in the dinoflagellate genus Symbiodinium
Source: PubMed Central journal article supplement (PMC4416395; doi:10.1186/s12862-015-0326-0), 2015-03-18
Supplement: 12862_2015_326_MOESM4_ESM.pdf [file 12862_2015_326_MOESM4_ESM.pdf]

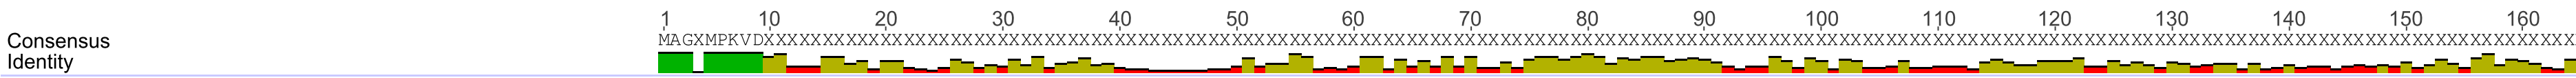

1. A1 (Casskb8) SymAPX1 rep\_c1302 MGNTQCCQSSDT S--PDAAAEAMPAMESWPANPGKS-A LDVPTVSGGNTAQERTYKVR LVKKEGQK LGLDVDYMAERSVLP I LVISGGIAEMWNKQHPDKKMNTGDSI TEVNGIKGNVA IMLEKCKADQ TLELTVVKCLTYGH LVADLEKIMLVK

2. A1 (CCMP2467) SymAPX1 GAKY01045714 MGNTQCCQSSDT S--PDAAAEAMPAMESWPANPGKS-A LDVPTVSGGNTAQERTYKVR LVKKEGQK LGLDVDYMAERSVLP I LVISGGIAEMWNKQHPDKKMNTGDSI TEVNGIKGNVA IMLEKCKADQ TLELTVVKCLTYGH

3. A1 (Casskb8) SymAPX1 rep\_c1797 MGNASCCKS-DTAPGVEATVDAK PALDSSLNA----- LPAVTGGKTDKERHYSIKLVKSGG LK LGLDVDYMAERSVLP IMSVTGGVAEKWNQDNPEMQIRK GDSI VEVNGTTGDVAQMLDKCKTDVELELTLRCCLNYDH LVADLEK LISAK

4. A1 (CCMP2467) SymAPX1 Locus\_9887 MGNASCCKS-DTAPGVEATVDAK PALDSSLNA----- LPAVTGGKTDKERHYSIKLVKSGG LK LGLDVDYMAERSVLP IMSVTGGVAEKWNQDNPEMQIRK GDSI VEVNGTTGDVAQMLDKCKTDVELELTLRCCLNYDH LVADLEK LISAK

5. A1 (Casskb8) SymAPX1 rep\_c1337 MGNTACCQSEANDGVADAHVDAKPILESALPA----- APFISGGDSEQER IYQVTL SKSPGQK LGLDVDYMAERK I LPI MHVTGGIAEEWNKK YPDRK LSSGDSI LEVNGISGDVVEMLE RCKADDT LKMKLCRCLTYDH LVEDLEK LI RRK

6. A1 (CCMP2467) SymAPX1 Locus\_51655 MGNTACCQSEANDGVADAHVDAKPILESALPA----- APFISGGDSEQER IYQVTL SKSPGQK LGLDVDYMAERK I LPI MHVTGGIAEEWNKK YPDRK LSSGDSI LEVNGISGDVVEMLE RCKADDT LKMKLCRCLTYDH LVEDLEK LI RRK

7. A1 (CCMP2467) SymAPX1 Assembly8

8. B1 (Mf1.05b) SymAPX1 Assembly1 MXNSQCCKSVDTSP--DEA-DAMPAMESWPAASNVPNGLQVPVVS GGSSVQERMYKVT LMK AEGQK LGLDVDYMAERSVLPV LEIKGGIAEQWNKQNP SKRINQGD SVVEVNGVRGNVA IMLEKCKADPTLELTI CKCLTFGLVQDLRK LIGIK

9. B1 (Mf1.05b) SymAPX1 rep\_c960 PSSDATVDARPAMDSSLQV----- LPPVAGGNT EKERVY SVK LTK SGDRK LGLDVFMAERVVLPIMT VTGGVAEVWNQEHPELPI SKGDSI LEVNGVSGDVAAM LDRCKTDMDLDMTLCKCLNYDH LVADLEK LVSNK

10. B1 (Ap1) SymAPX1 KJ672513 YMAERSVLP I LVISGGIAEQWNKEHPERKMNAGDGVVEVNGVRGNVA IMLEKCKSDPTLELTI CKCLTYNH LVADLEK LISIK

11. B1 (Mf1.05b) SymAPX1 Assembly3 FMETWPA-PGKP-PMEVPAVSGG-GPQERWYKVT LVK SAGMK LGMDVDYMAERSVLP I LVISGGIAEQWNKEHPERKMNAGDGVVEVNGVRGNVA IMLEKCKSDPTLELTI CKCLTYNH LVADLEK LISIK

12. B1 (Mf1.05b) SymAPX1 rep\_c30083 SGGNTVQERMYKVS LTK VDGVS LGMDVDY LAERCVLPI LFIAGGLTEQWNKEHPENKISTGDSI VEVNGVRGDVANMLQCKVDPLDLTI CKCLTYGH LVQDLEN LISIK

13. B1 (Mf1.05b) SymAPX1 Assembly4 TGNVTEI LEKCKADST LKMKICRCLTYEF LLEDLEK LI RHK

14. C1 (CCMP2466) SymAPX1 KF835562 EVNGVRGNVA IMLEKCKHDPTLELTI CKCLTYGH LISDLQK IMTIK

15. C3 (S.hystrix) SymAPX1 HM156698 MG-AQCCKSVDTG--PDGMGEAMPTMESWPPSG---SPME LPAVSGG-RVEERMYKVT LVKKEGQK LGLDVFMAERSVLP I LTISGGIAEQWNNQHPYRKMSTSDSI VEVNGVRGNVA IMLEKCKHDPTLELTI CKCLTYGH LISDLQK IMTIK

16. C3 (A.aspera) SymAPX1 FE865713 MG-AQCCKSVDTG--PDGMGEAMP-MESWPPSG---SPME LPAVSGG-RVEERMYKVT LVKKEGQK LGLDVFMAERSVLP I LTISGGIAEQWNNQHPYRKMSTSDSI VEVNGVRGNVA IMLEKCKHDPTLEL

17. C15 (M.digitata) SymAPX1 KJ672515 VEVNGVRGNVA IMLEKCKHDPTLELTI CKCLTYGH LISDLQK IMTTK

18. D (A.hyacinthus) SymAPX1 GAFF01005798 MGNTQCCKSVDT S--PDAAAEAMPTLESWPANPGKP-LIEVPAVSGGNSPQERMYKVS LVKTEGQK LGLDVDYMAERSVLP I LVISGGIAEQWNRSHPERKMNTGDSI VEVNGIRGNVA IMLEKCKVDATLELTI CKCLTYGH LVADLEK LISIK

19. D (A.hyacinthus) SymAPX1 GAFF01021256 MG-ATCCKT-DTAPSSDATVEARPALDSSLA----- LPLVTGGTTEKERLYTVK LTK SGDRK LGLDVFMAERK VLPIMT VTGGVAE IWNQEHPELQISKGDSI IKVNGVTGDVAAM LDRCKTDMELELTLCKCLNF EYLVVDLEK LITSK

20. F1 (Mv) SymAPX1 KJ672514 MG-VQCCKSADT S--PDAAG-DMPMMESWPP TK-----MD LPA LSGG-KADERMYKVT LVK QAGKK LGLDVDYMVERSVLPV LGISGGTAE EWNK NPNK KMNI GDSLVEVNGVRGNVA IMLEKCKNDATLELTLCKSLTFGLVSDLEK LVSLK

21. F1 (CCMP2468) SymAPX1 Assembly7 MG-VQCCKSADT S--PDAAG-DMPMMESWPP TK-----MD LPA LSGG-KADERMYKVT LVK QAGKK LGLDVDYMVERSVLPV LGISGGTAE EWNK NPNK KMNI GDSLVEVNGVRGNVA IMLEKCKNDATLELTLCKSLTFGLVSDLEK LVSLK

22. F1 (CCMP2468) SymAPX1 Assembly2 MG-ASCCTPSETASGSDATVDARPVLDSSLQT----- WPPVAGGNT EKERIFIVK LRK TGE LK LGLDVFMAERSVLPIMT VTGGVAEKWNQEHPELPI SRGDSI LEVNGVSGDLTQMLDRCKTDTE LQLTLCKCLSYDH LVSDLEK LISK

23. F1 (CCMP2468) SymAPX1 Assembly3

24. A1 (Casskb8) SymAPX2 Assembly1 P SSGVAGVTXLV GAG LVASAA LXRSVK PRGGKKN LV SMAARGGE----- SYDA LVK DLET LVKEK

25. A1 (CCMP2467) SymAPX2 Locus\_1984 PRGGKKN LVSI AARGGE----- SYDA LVK DLET LVKEK

26. A1 (CCMP2467) SymAPX2 KJ672516 V SMAARGGE----- SYDA LVK DLET LVKEK

27. B1 (Mf1.05b) SymAPX2 rep\_c23432

28. C3 (A.aspera) SymAPX2 Assembly1

29. D (A.hyacinthus) SymAPX2 GAFF01018157 MTKRGN SKVAQAV ALAATAAAGS AFSMMAAPSALESRI TSTP SQIGATRST TGT YGVAGVSVV GAG LVASAAFGRRSAK QSRQRGVV SMAARGGE----- SYDS LVK DLQE LVKTK

30. D (A.hyacinthus) SymAPX2 GAFF01007188 MLLASPSFFGRFAWLLS LVS LAWPA LG-DAATEGQC DAATGK CGSMAE----- SYDA LVK DLEE LVRTK

31. A1 (Casskb8) SymAPX3 Assembly2 MGNACSDGCFGMLGSK-KVSQLKACKQDLKK FIDSK

32. A1 (Casskb8) SymAPX3 Assembly3 MGNACSDGCFGMLGSK-KVSQLRACKQDLKK FIDSK

33. A1 (Casskb8) SymAPX3 rep\_c280 MGNACSDGCFGMLASK-KVSQLRACKQDLKK FIDSK

34. A1 (CCMP2467) SymAPX3 Locus\_31699

35. A1 (CCMP2467) SymAPX3 Assembly4 MGNACSDGCFGMLASK-KVSQLRACKQDLKK VIDSK

36. D (A.hyacinthus) SymAPX3 GAFF01006424 MGNACSNCFAM LGGNPKAAELRACK EIKT LIETR

37. B1 (Mf1.05b) SymAPX4 Assembly2 PLEEYVRCRAELIK FIDEN

38. D (A.hyacinthus) SymAPX4 GAFF01007747 MAQMEHYVK CREELIK FIDEN

39. F1 (CCMP2468) SymAPX4 KC944388

40. A1 (Casskb8) SymAPX5 rep\_C18778 MAGKMPKVDDGGDGTN LGDED LVCNCHSV PPKVIRDA IKNGAHTFED IKKCTKAGTGC GT CIRNPGQPK LLSHT LNS LGVEK GCCKSLPFEADDIED LAKARQ IKTYEE LVSN LGYPPAAVEGDKAALAGV LDRIGGK PKGEGMDHAGQLKA IKE DLWK FVDKM

41. A1 (CCMP2467) SymAPX5 Locus\_10740 K PKGEGMDHAGQLKA IKE DLWK FVDKM

42. D (A.hyacinthus) SymAPX5 Assembly1 MAGQMPKVDDGGDGTN LGDDDHVCNCHSV PPKVIRDA IMKGAHTFEE IKKCTKAGTGC GT CIRNPGQPK LLAHT LNAK GVEAGVCKSLPFTHDDIED LAKARQ IKSYDE LVSH LGYPSAAESDKTALGG LLDRI GGK PKGEGLDH LGQLKA IKE DLWK FVDKM

43. A1 (CCMP2467) SymAPX6 Locus\_36434 MGQRCHGVAVAVLCLCCLRG LTRCFLTSTPCPG LRRRDHTLHW LVATGFAPAAEFEGDAACI REAARTQT LQDP

44. B1 (Mf1.05b) SymAPX6 rep\_c6573

45. A1 (Casskb8) APX Assembly4 MWRLATIFSQMRASFEA APCAGEDLVS QLRACK EELK FINEQ

46. A1 (CCMP2467) APX Locus\_35678 MWRLATIFSQMRASFEA APCAGEDLVS QLRACK EELK FINEQ
