# Supplementary material for: Transcriptomic characterization of the enzymatic antioxidants FeSOD, MnSOD, APX and KatG in the dinoflagellate genus Symbiodinium
Source: PubMed Central journal article supplement (PMC4416395; doi:10.1186/s12862-015-0326-0), 2015-03-18
Supplement: 12862_2015_326_MOESM7_ESM.pdf [file 12862_2015_326_MOESM7_ESM.pdf]

|                                      |    | SymKatG1                             |      |      |     |      |      |     |     |     |      |     |     | SymKatG2                             |      |     |     |
|--------------------------------------|----|--------------------------------------|------|------|-----|------|------|-----|-----|-----|------|-----|-----|--------------------------------------|------|-----|-----|
|                                      |    | A1 Casskb8 SymKatG1 Assembly2        |      |      |     |      |      |     |     |     |      |     |     | A1 Casskb8 SymKatG2_c15386           |      |     |     |
|                                      |    | A1 CCMP2467 SymKatG1 KJ735681        |      |      |     |      |      |     |     |     |      |     |     | A1 CCMP2467 SymKatG2 Assembly2       |      |     |     |
|                                      |    | A1 CCMP2467 SymKatG1 Assembly3       |      |      |     |      |      |     |     |     |      |     |     | B1 Mf1.05b SymKatG2 c_32035          |      |     |     |
|                                      |    | A1 CCMP2467 SymKatG1 Assembly1       |      |      |     |      |      |     |     |     |      |     |     | D A.hyacinthus SymKatG2 GAFP01010883 |      |     |     |
|                                      |    | B1 Ap1 SymKatG1 KJ672511             |      |      |     |      |      |     |     |     |      |     |     |                                      |      |     |     |
|                                      |    | B1 Mf1.05b SymKatG1 Assembly1        |      |      |     |      |      |     |     |     |      |     |     |                                      |      |     |     |
|                                      |    | C1 CCMP2466 SymKatG1 KF835563        |      |      |     |      |      |     |     |     |      |     |     |                                      |      |     |     |
|                                      |    | C3 A.aspera SymKatG1 Assembly1       |      |      |     |      |      |     |     |     |      |     |     |                                      |      |     |     |
|                                      |    | D A.hyacinthus SymKatG1 GAFP1022639  |      |      |     |      |      |     |     |     |      |     |     |                                      |      |     |     |
|                                      |    | D A.hyacinthus SymKatG1 GAFP01010732 |      |      |     |      |      |     |     |     |      |     |     |                                      |      |     |     |
|                                      |    | E CCMP421 SymKatG1 KJ672510          |      |      |     |      |      |     |     |     |      |     |     |                                      |      |     |     |
|                                      |    | F1 Mv SymKatG1 KJ672509              |      |      |     |      |      |     |     |     |      |     |     |                                      |      |     |     |
|                                      |    | Y                                    |      |      |     |      |      |     |     |     |      |     |     | Y                                    |      |     |     |
| Full length                          |    | Ungapped length [aa]                 |      |      |     |      |      |     |     |     |      |     |     |                                      |      |     |     |
|                                      |    | 355                                  | 230  | 93   | 83  | 363  | 486  | 397 | 370 | 216 | 143  | 335 | 289 | 364                                  | 368  | 231 | 423 |
| A1 Casskb8 SymKatG1 Assembly2        | 1  |                                      | 100% | 99%  | N/A | 75%  | 72%  | 78% | 77% | 74% | 100% | 77% | 79% | 39%                                  | 39%  | 36% | 36% |
| A1 CCMP2467 SymKatG1 KJ735681        | 2  | 100%                                 |      | 100% | N/A | 71%  | 69%  | 78% | 79% | 74% | N/A  | 76% | 79% | 39%                                  | 39%  | 35% | 35% |
| A1 CCMP2467 SymKatG1 Assembly3       | 3  | 99%                                  | 100% |      | N/A | 75%  | 75%  | 83% | 82% | 80% | N/A  | 83% | 84% | 42%                                  | 42%  | 42% | 40% |
| A1 CCMP2467 SymKatG1 Assembly1       | 4  | N/A                                  | N/A  | N/A  |     | 69%  | 69%  | 66% | 66% | N/A | 76%  | 87% | 67% | 39%                                  | 39%  | N/A | 36% |
| B1 Ap1 SymKatG1 KJ672511             | 5  | 75%                                  | 71%  | 75%  | 69% |      | 100% | 84% | 83% | 75% | 67%  | 87% | 87% | 34%                                  | 34%  | 40% | 35% |
| B1 Mf1.05b SymKatG1 Assembly1        | 6  | 72%                                  | 69%  | 75%  | 69% | 100% |      | 84% | 83% | 73% | 67%  | 86% | 87% | 36%                                  | 36%  | 34% | 34% |
| C1 CCMP2466 SymKatG1 KF835563        | 7  | 78%                                  | 78%  | 83%  | 66% | 84%  | 84%  |     | 98% | 80% | 68%  | 90% | 92% | 35%                                  | 35%  | 40% | 37% |
| C3 A.aspera SymKatG1 Assembly1       | 8  | 77%                                  | 79%  | 82%  | 66% | 83%  | 83%  | 98% |     | 79% | 70%  | 90% | 91% | 36%                                  | 36%  | 39% | 36% |
| D A.hyacinthus SymKatG1 GAFP1022639  | 9  | 74%                                  | 74%  | 80%  | N/A | 75%  | 73%  | 80% | 79% |     | N/A  | 79% | 80% | 39%                                  | 40%  | 34% | 35% |
| D A.hyacinthus SymKatG1 GAFP01010732 | 10 | 100%                                 | N/A  | N/A  | 76% | 67%  | 67%  | 68% | 70% | N/A |      | 90% | 83% | 33%                                  | 33%  | N/A | 33% |
| E CCMP421 SymKatG1 KJ672510          | 11 | 77%                                  | 76%  | 83%  | 87% | 87%  | 86%  | 90% | 90% | 79% | 90%  |     | 90% | 40%                                  | 40%  | 39% | 39% |
| F1 Mv SymKatG1 KJ672509              | 12 | 79%                                  | 79%  | 84%  | 67% | 87%  | 87%  | 92% | 91% | 80% | 83%  | 90% |     | 40%                                  | 40%  | 40% | 40% |
| A1 Casskb8 SymKatG2_c15386           | 13 | 39%                                  | 39%  | 42%  | 39% | 34%  | 36%  | 35% | 36% | 39% | 33%  | 40% | 40% |                                      | 100% | 77% | 76% |
| A1 CCMP2467 SymKatG2 Assembly2       | 14 | 39%                                  | 39%  | 42%  | 39% | 34%  | 36%  | 35% | 36% | 40% | 33%  | 40% | 40% | 100%                                 |      | 76% | 76% |
| B1 Mf1.05b SymKatG2 c_32035          | 15 | 36%                                  | 35%  | 42%  | N/A | 40%  | 34%  | 40% | 39% | 34% | N/A  | 39% | 40% | 77%                                  | 76%  |     | 81% |
| D A.hyacinthus SymKatG2 GAFP01010883 | 16 | 36%                                  | 35%  | 40%  | 36% | 35%  | 34%  | 37% | 36% | 35% | 33%  | 39% | 40% | 76%                                  | 76%  | 81% |     |
