# Supplementary material for: Transcriptomic characterization of the enzymatic antioxidants FeSOD, MnSOD, APX and KatG in the dinoflagellate genus Symbiodinium
Source: PubMed Central journal article supplement (PMC4416395; doi:10.1186/s12862-015-0326-0), 2015-03-18
Supplement: 12862_2015_326_MOESM11_ESM.pdf [file 12862_2015_326_MOESM11_ESM.pdf]

Table S2. List of biogeographic origin and sequence IDs and accession numbers of used contigs for all antioxidant sequences presented in this study. New sequences generated in this study are highlighted (\*).

| Gene  | Sequence name                   | ITS2 type | Culture ID | Host                         | Geographic origin | Contigs used for sequence assembly                                                                                                                                             |
|-------|---------------------------------|-----------|------------|------------------------------|-------------------|--------------------------------------------------------------------------------------------------------------------------------------------------------------------------------|
| MnSOD | A1 Casskb8 MnSOD _c18645        | A1        | Casskb8    | <i>Cassiopea xamachana</i>   | Hawai'i           | kb8_c18645                                                                                                                                                                     |
| MnSOD | A1 Casskb8 MnSOD rep_c710       | A1        | Casskb8    | <i>Cassiopea xamachana</i>   | Hawai'i           | kb8_rep_c710                                                                                                                                                                   |
| MnSOD | A1 Casskb8 SymMnSOD3 rep_c4192  | A1        | Casskb8    | <i>Cassiopea xamachana</i>   | Hawai'i           | kb8_rep_c4192                                                                                                                                                                  |
| MnSOD | A1 CCMP2467 MnSOD Assembly1     | A1        | CCMP2467   | <i>Stylophora pistillata</i> | Red Sea           | gi 556381675 gb GAKY01035952.1 <br>gi 556381673 gb GAKY01035954.1 <br>gi 556381670 gb GAKY01035956.1 <br>gi 556381668 gb GAKY01035958.1 <br>gi 556375787 gb GAKY01041471.1     |
| MnSOD | A1 CCMP2467 MnSOD Assembly3     | A1        | CCMP2467   | <i>Stylophora pistillata</i> | Red Sea           | gi 556374884 gb GAKY01042229.1 <br>gi 556374883 gb GAKY01042230.1 <br>gi 556374881 gb GAKY01042231.1 <br>gi 556374878 gb GAKY01042234.1                                        |
| MnSOD | A1 CCMP2467 MnSOD Assembly4     | A1        | CCMP2467   | <i>Stylophora pistillata</i> | Red Sea           | gi 556374880 gb GAKY01042232.1 <br>gi 556374879 gb GAKY01042233.1 <br>gi 556242634 gb GAKY01158064.1                                                                           |
| MnSOD | A1 CCMP2467 SymMnSOD3 Assembly2 | A1        | CCMP2467   | <i>Stylophora pistillata</i> | Red Sea           | gi 556202041 gb GAKY01194558.1 <br><br>gi 556202040 gb GAKY01194559.1 <br>gi 556202039 gb GAKY01194560.1 <br>gi 556202038 gb GAKY01194561.1 <br>gi 556202037 gb GAKY01194562.1 |
| MnSOD | A1 CCMP2467 SymMnSOD3 Assembly6 | A1        | CCMP2467   | <i>Stylophora pistillata</i> | Red Sea           | gi 556239202 gb GAKY01161046.1 <br><br>gi 556202036 gb GAKY01194563.1                                                                                                          |

|        |                                       |     |          |                               |                    |                                                                                                                                                                                                                      |
|--------|---------------------------------------|-----|----------|-------------------------------|--------------------|----------------------------------------------------------------------------------------------------------------------------------------------------------------------------------------------------------------------|
| *MnSOD | B1 Ap1 SymMnSOD1 KJ672521             | B1  | Ap1      | <i>Aiptasia pulchella</i>     | Hawai'i            | GenBank KJ672521                                                                                                                                                                                                     |
| MnSOD  | B1 Mf1.05b MnSOD_c29099               | B1  | Mf1.05b  | <i>Orbicella faveolata</i>    | Florida Keys       | mf105_c29099                                                                                                                                                                                                         |
| MnSOD  | B1 Mf1.05b SymMnSOD1 Assembly2        | B1  | Mf1.05b  | <i>Orbicella faveolata</i>    | Florida Keys       | mf105_rep_c3255<br>mf105_s63926<br>mf105_s64469                                                                                                                                                                      |
| MnSOD  | B1 Mf1.05b SymMnSOD2 Assembly1        | B1  | Mf1.05b  | <i>Orbicella faveolata</i>    | Florida Keys       | mf105_c50851<br>mf105_rep_c50851<br>mf105_rep_c9010<br>mf105_s74052                                                                                                                                                  |
| MnSOD  | B1 Mf1.05b SymMnSOD2 rep_c13368       | B1  | Mf1.05b  | <i>Orbicella faveolata</i>    | Florida Keys       | mf105_rep_c13368                                                                                                                                                                                                     |
| MnSOD  | B1 Mf1.05b SymMnSOD3_c19510           | B1  | Mf1.05b  | <i>Orbicella faveolata</i>    | Florida Keys       | mf105_c19510                                                                                                                                                                                                         |
| MnSOD  | C1 CCMP2466 SymMnSOD1 AHI54358        | C1  | CCMP2466 | <i>Discosoma sanctithomae</i> | Jamaica            | GenBank AHI54358                                                                                                                                                                                                     |
| *MnSOD | C15 M.digitata SymMnSOD1 KJ672522     | C15 | N/A      | <i>Montipora digitata</i>     | Great Barrier Reef | GenBank KJ672522                                                                                                                                                                                                     |
| MnSOD  | C3 A.aspera SymMnSOD1 FE866047        | C3  | N/A      | <i>Acropora aspera</i>        | Great Barrier Reef | GenBank FE866047                                                                                                                                                                                                     |
| *MnSOD | C3 Mp SymMnSOD1 KJ672520              | C3  | Mp       | <i>Mastigias papua</i>        | Palau              | GenBank KJ672520                                                                                                                                                                                                     |
| MnSOD  | D A.hyacinthus SymMnSOD2 GAFF01017905 | D   | N/A      | <i>Acropora hyacinthus</i>    | American Samoa     | gi 452163680 gb GAFF01017905.1                                                                                                                                                                                       |
| MnSOD  | D A.hyacinthus SymMnSOD3 GAFF01006955 | D   | N/A      | <i>Acropora hyacinthus</i>    | American Samoa     | gi 452174630 gb GAFF01006955.1                                                                                                                                                                                       |
| MnSOD  | F1 CCMP2468 SymMnSOD2 Assembly1       | F1  | CCMP2468 | <i>Montipora capitata</i>     | Hawai'i            | gi 512780496 gb KC937118.1 <br>gi 512783950 gb KC940572.1 <br>gi 512788616 gb KC945238.1 <br>gi 512788962 gb KC945584.1 <br>gi 512793081 gb KC949703.1 <br>gi 512793147 gb KC949769.1 <br>gi 512794392 gb KC951014.1 |
| FeSOD  | A PF-2005 SymFeSOD AY916504           | A   | PF-2005  | ?                             | ?                  | GenBank AY916504                                                                                                                                                                                                     |
| *FeSOD | B1 Ap1 SymFeSOD KJ672519              | B1  | Ap1      | <i>Aiptasia pulchella</i>     | Hawai'i            | GenBank KJ672519                                                                                                                                                                                                     |

|        |                                     |    |          |                              |             |                                                                                |
|--------|-------------------------------------|----|----------|------------------------------|-------------|--------------------------------------------------------------------------------|
| *FeSOD | E CCMP421 SymFeSOD KJ672517         | E  | CCMP421  | free-living                  | New Zealand | GenBank KJ672517                                                               |
| *FeSOD | F1 Mv SymFeSOD KJ672518             | F1 | Mv       | <i>Montipora capitata</i>    | Hawai'i     | GenBank KJ672518                                                               |
| APX    | A1 Casskb8 APX Assembly4            | A1 | Casskb8  | <i>Cassiopea xamachana</i>   | Hawai'i     | kb8_rep_c17856<br>kb8_rep_c21314                                               |
| APX    | A1 Casskb8 SymAPX rep_c1337         | A1 | Casskb8  | <i>Cassiopea xamachana</i>   | Hawai'i     | kb8_rep_c1337                                                                  |
| APX    | A1 Casskb8 SymAPX1 rep_c1302        | A1 | Casskb8  | <i>Cassiopea xamachana</i>   | Hawai'i     | kb8_rep_c1302                                                                  |
| APX    | A1 Casskb8 SymAPX1 rep_c1797        | A1 | Casskb8  | <i>Cassiopea xamachana</i>   | Hawai'i     | kb8_rep_c1797                                                                  |
| APX    | A1 Casskb8 SymAPX2 Assembly1        | A1 | Casskb8  | <i>Cassiopea xamachana</i>   | Hawai'i     | kb8_rep_c25023<br>kb8_rep_c47803<br>kb8_rep_c53272<br>kb8_s59539<br>kb8_s66605 |
| APX    | A1 Casskb8 SymAPX3 Assembly2        | A1 | Casskb8  | <i>Cassiopea xamachana</i>   | Hawai'i     | kb8_rep_c161<br>kb8_s59940<br>kb8_s66277                                       |
| APX    | A1 Casskb8 SymAPX3 Assembly3        | A1 | Casskb8  | <i>Cassiopea xamachana</i>   | Hawai'i     | kb8_rep_c2735<br>kb8_s66202                                                    |
| APX    | A1 Casskb8 SymAPX3 rep_c280         | A1 | Casskb8  | <i>Cassiopea xamachana</i>   | Hawai'i     | kb8_rep_c280                                                                   |
| APX    | A1 Casskb8 SymAPX5 rep_c18778       | A1 | Casskb8  | <i>Cassiopea xamachana</i>   | Hawai'i     | kb8_rep_c18778                                                                 |
| APX    | A1 CCMP2467 APX Locus_35678         | A1 | CCMP2467 | <i>Stylophora pistillata</i> | Red Sea     | gi 556278914 gb GAKY01124934.1                                                 |
| APX    | A1 CCMP2467 SymAPX1 Assembly8       | A1 | CCMP2467 | <i>Stylophora pistillata</i> | Red Sea     | gi 556203728 gb GAKY01192980.1 +<br>Locus_33092                                |
| APX    | A1 CCMP2467 SymAPX1<br>GAKY01045714 | A1 | CCMP2467 | <i>Stylophora pistillata</i> | Red Sea     | gi 556370780 gb GAKY01045714.1                                                 |
| APX    | A1 CCMP2467 SymAPX1<br>Locus_51655  | A1 | CCMP2467 | <i>Stylophora pistillata</i> | Red Sea     | gi 556237089 gb GAKY01162872.1                                                 |

|      |                                    |    |          |                              |         |  |                                |
|------|------------------------------------|----|----------|------------------------------|---------|--|--------------------------------|
|      |                                    |    |          |                              |         |  | gi 556237087 gb GAKY01162873.1 |
|      |                                    |    |          |                              |         |  | gi 556237086 gb GAKY01162874.1 |
| APX  | A1 CCMP2467 SymAPX1<br>Locus_9887  | A1 | CCMP2467 | <i>Stylophora pistillata</i> | Red Sea |  | gi 556370789 gb GAKY01045707.1 |
|      |                                    |    |          |                              |         |  | gi 556370788 gb GAKY01045708.1 |
|      |                                    |    |          |                              |         |  | gi 556370779 gb GAKY01045715.1 |
| *APX | A1 CCMP2467 SymAPX2 KJ672516       | A1 | CCMP2467 | <i>Stylophora pistillata</i> | Red Sea |  | NCBI KJ672516                  |
| APX  | A1 CCMP2467 SymAPX2<br>Locus_1984  | A1 | CCMP2467 | <i>Stylophora pistillata</i> | Red Sea |  | gi 556411510 gb GAKY01009605.1 |
|      |                                    |    |          |                              |         |  | gi 556411509 gb GAKY01009606.1 |
|      |                                    |    |          |                              |         |  | gi 556411508 gb GAKY01009607.1 |
|      |                                    |    |          |                              |         |  | gi 556411507 gb GAKY01009608.1 |
|      |                                    |    |          |                              |         |  | gi 556411506 gb GAKY01009609.1 |
|      |                                    |    |          |                              |         |  | gi 556411504 gb GAKY01009610.1 |
| APX  | A1 CCMP2467 SymAPX3 Assembly4      | A1 | CCMP2467 | <i>Stylophora pistillata</i> | Red Sea |  | gi 556282844 gb GAKY01121695.1 |
|      |                                    |    |          |                              |         |  | gi 556248744 gb GAKY01152490.1 |
|      |                                    |    |          |                              |         |  | gi 556210679 gb GAKY01186456.1 |
|      |                                    |    |          |                              |         |  | gi 556210677 gb GAKY01186457.1 |
| APX  | A1 CCMP2467 SymAPX3<br>Locus_31699 | A1 | CCMP2467 | <i>Stylophora pistillata</i> | Red Sea |  | gi 556288848 gb GAKY01116859.1 |
|      |                                    |    |          |                              |         |  | gi 556288847 gb GAKY01116860.1 |
|      |                                    |    |          |                              |         |  | gi 556288845 gb GAKY01116861.1 |
|      |                                    |    |          |                              |         |  | gi 556288844 gb GAKY01116862.1 |
|      |                                    |    |          |                              |         |  | gi 556288843 gb GAKY01116863.1 |
|      |                                    |    |          |                              |         |  | gi 556288842 gb GAKY01116864.1 |
| APX  | A1 CCMP2467 SymAPX5<br>Locus_10740 | A1 | CCMP2467 | <i>Stylophora pistillata</i> | Red Sea |  | gi 556366894 gb GAKY01049344.1 |
|      |                                    |    |          |                              |         |  | gi 556366892 gb GAKY01049346.1 |
|      |                                    |    |          |                              |         |  | gi 556366889 gb GAKY01049349.1 |
| APX  | A1 CCMP2467 SymAPX6<br>Locus_36434 | A1 | CCMP2467 | <i>Stylophora pistillata</i> | Red Sea |  | gi 556275911 gb GAKY01127507.1 |
|      |                                    |    |          |                              |         |  | gi 556275910 gb GAKY01127508.1 |
| *APX | B1 Ap1 SymAPX1 KJ672513            | B1 | Ap1      | <i>Aiptasia pulchella</i>    | Hawai'i |  | GenBank KJ672513               |

|      |                                        |     |          |                               |                    |                                                                            |
|------|----------------------------------------|-----|----------|-------------------------------|--------------------|----------------------------------------------------------------------------|
| APX  | B1 Mf1.05b SymAPX1 Assembly1           | B1  | Mf1.05b  | <i>Orbicella faveolata</i>    | Florida Keys       | mf105_rep_c1375<br>mf105_rep_c20868                                        |
| APX  | B1 Mf1.05b SymAPX1 Assembly3           | B1  | Mf1.05b  | <i>Orbicella faveolata</i>    | Florida Keys       | mf105_rep_c1624<br>mf105_s62425                                            |
| APX  | B1 Mf1.05b SymAPX1 Assembly4           | B1  | Mf1.05b  | <i>Orbicella faveolata</i>    | Florida Keys       | mf105_c30166<br>mf105_s54996                                               |
| APX  | B1 Mf1.05b SymAPX1 rep_c30083          | B1  | Mf1.05b  | <i>Orbicella faveolata</i>    | Florida Keys       | mf105_rep_c30083                                                           |
| APX  | B1 Mf1.05b SymAPX1 rep_c960            | B1  | Mf1.05b  | <i>Orbicella faveolata</i>    | Florida Keys       | mf105_rep_c960                                                             |
| APX  | B1 Mf1.05b SymAPX2 rep_c23432          | B1  | Mf1.05b  | <i>Orbicella faveolata</i>    | Florida Keys       | mf105_rep_c23432                                                           |
| APX  | B1 Mf1.05b SymAPX4 Assembly2           | B1  | Mf1.05b  | <i>Orbicella faveolata</i>    | Florida Keys       | mf105_rep_c287<br>mf105_s64607<br>mf105_s71948                             |
| APX  | B1 Mf1.05b SymAPX6 rep_c6573           | B1  | Mf1.05b  | <i>Orbicella faveolata</i>    | Florida Keys       | mf105_rep_c6573                                                            |
| *APX | C1 CCMP2466 SymAPX1 KF835562           | C1  | CCMP2466 | <i>Discosoma sanctithomae</i> | Jamaica            | GenBank KF835562                                                           |
| *APX | C15 M.digitata SymAPX1 KJ672515        | C15 | N/A      | <i>Montipora digitata</i>     | Great Barrier Reef | GenBank KJ672515                                                           |
| APX  | C3 A.aspera SymAPX1 FE865713           | C3  | N/A      | <i>Acropora aspera</i>        | Great Barrier Reef | gi 186958871 gb FE865713.1 FE865713                                        |
| APX  | C3 A.aspera SymAPX2 Assembly1          | C3  | N/A      | <i>Acropora aspera</i>        | Great Barrier Reef | gi 169299971 gb FE538076.1 FE538076<br>gi 169299972 gb FE538077.1 FE538077 |
| APX  | C3 S.hystrix SymAPX1 HM156698          | C3  | N/A      | <i>Seriatopora hystrix</i>    | Republic of China  | NCBI HM156698                                                              |
| APX  | D A.hyacinthus SymAPX1<br>GAFP01005798 | D   | N/A      | <i>Acropora hyacinthus</i>    | American Samoa     | gi 452175787 gb GAFP01005798.1                                             |
| APX  | D A.hyacinthus SymAPX1<br>GAFP01021256 | D   | N/A      | <i>Acropora hyacinthus</i>    | American Samoa     | gi 452160329 gb GAFP01021256.1                                             |
| APX  | D A.hyacinthus SymAPX2<br>GAFP01007188 | D   | N/A      | <i>Acropora hyacinthus</i>    | American Samoa     | gi 452174397 gb GAFP01007188.1                                             |
| APX  | D A.hyacinthus SymAPX2<br>GAFP01018157 | D   | N/A      | <i>Acropora hyacinthus</i>    | American Samoa     | gi 452163428 gb GAFP01018157.1                                             |
| APX  | D A.hyacinthus SymAPX3<br>GAFP01006424 | D   | N/A      | <i>Acropora hyacinthus</i>    | American Samoa     | gi 452175161 gb GAFP01006424.1                                             |
| APX  | D A.hyacinthus SymAPX4<br>GAFP01007747 | D   | N/A      | <i>Acropora hyacinthus</i>    | American Samoa     | gi 452173838 gb GAFP01007747.1                                             |
| APX  | D A.hyacinthus SymAPX5<br>Assembly1    | D   | N/A      | <i>Acropora hyacinthus</i>    | American Samoa     | gi 452178808 gb GAFP01002806.1                                             |

gi|452181480|gb|GAFP01000134.1|

|       |    |          |          |           |    |          |                              |              |                                                                                                                                                                                |
|-------|----|----------|----------|-----------|----|----------|------------------------------|--------------|--------------------------------------------------------------------------------------------------------------------------------------------------------------------------------|
| APX   | F1 | CCMP2468 | SymAPX1  | Assembly2 | F1 | CCMP2468 | <i>Montipora capitata</i>    | Hawai'i      | gi 512790905 gb KC947527.1 <br>gi 512792839 gb KC949461.1 <br>gi 512793621 gb KC950243.1 <br>gi 512794239 gb KC950861.1                                                        |
| APX   | F1 | CCMP2468 | SymAPX1  | Assembly3 | F1 | CCMP2468 | <i>Montipora capitata</i>    | Hawai'i      | gi 512786816 gb KC943438.1 <br>gi 512791389 gb KC948011.1 <br>gi 512792900 gb KC949522.1 <br>gi 512793754 gb KC950376.1                                                        |
| APX   | F1 | CCMP2468 | SymAPX1  | Assembly7 | F1 | CCMP2468 | <i>Montipora capitata</i>    | Hawai'i      | gi 512787724 gb KC944346.1 <br>gi 512794427 gb KC951049.1                                                                                                                      |
| APX   | F1 | CCMP2468 | SymAPX4  | KC944388  | F1 | CCMP2468 | <i>Montipora capitata</i>    | Hawai'i      | gi 512787766 gb KC944388.1                                                                                                                                                     |
| *APX  | F1 | Mv       | SymAPX1  | KJ672514  | F1 | Mv       | <i>Montipora capitata</i>    | Hawai'i      | GenBank KJ672514                                                                                                                                                               |
| KatG  | A1 | Casskb8  | SymKatG1 | Assembly2 | A1 | Casskb8  | <i>Cassiopea xamachana</i>   | Hawai'i      | kb8_c15217<br><br>kb8_c40578<br>kb8_rep_c52653<br>kb8_rep_c52669                                                                                                               |
| *KatG | A1 | CCMP2467 | SymKatG1 | KJ735681  | A1 | CCMP2467 | <i>Stylophora pistillata</i> | Red Sea      | GenBank KJ735681                                                                                                                                                               |
| KatG  | A1 | CCMP2467 | SymKatG1 | Assembly1 | A1 | CCMP2467 | <i>Stylophora pistillata</i> | Red Sea      | gi 556313331 gb GAKY01096276.1 <br><br>gi 556313326 gb GAKY01096280.1 <br>gi 556313330 gb GAKY01096277.1 <br>gi 556313328 gb GAKY01096279.1 <br>gi 556313329 gb GAKY01096278.1 |
| KatG  | A1 | CCMP2467 | SymKatG1 | Assembly3 | A1 | CCMP2467 | <i>Stylophora pistillata</i> | Red Sea      | gi 556419849 gb GAKY01002437.1 <br><br>gi 556419848 gb GAKY01002438.1 <br>gi 556419847 gb GAKY01002439.1                                                                       |
| *KatG | B1 | Ap1      | SymKatG1 | KJ672511  | B1 | Ap1      | <i>Aiptasia pulchella</i>    | Hawai'i      | GenBank KJ672511                                                                                                                                                               |
| KatG  | B1 | Mf1.05b  | SymKatG1 | Assembly1 | B1 | Mf1.05b  | <i>Orbicella faveolata</i>   | Florida Keys | mf105_rep_c11051<br>mf105_rep_c14326                                                                                                                                           |

mf105\_rep\_c169  
mf105\_rep\_c35625  
mf105\_rep\_c50341  
mf105\_s50647  
mf105\_s58339  
mf105\_s62531  
mf105\_s72023  
mf105\_s74129

|       |                                         |    |          |                                   |                    |                                                                                                                                                                                                 |
|-------|-----------------------------------------|----|----------|-----------------------------------|--------------------|-------------------------------------------------------------------------------------------------------------------------------------------------------------------------------------------------|
| *KatG | C1 CCMP2466 SymKatG1<br>KF835563        | C1 | CCMP2466 | <i>Discosoma<br/>sanctithomae</i> | Jamaica            | GenBank KF835563                                                                                                                                                                                |
| KatG  | C3 A.aspera SymKatG1 Assembly1          | C3 | N/A      | <i>Acropora aspera</i>            | Great Barrier Reef | gi 145309691 gb EH036045.1 EH036045<br>gi 145309692 gb EH036046.1 EH036046<br>gi 145309693 gb EH036047.1 EH036047<br>gi 145309694 gb EH036048.1 EH036048<br>gi 186961140 gb FE866054.1 FE866054 |
| KatG  | D A.hyacinthus SymKatG1<br>GAFF01010732 | D  | N/A      | <i>Acropora hyacinthus</i>        | American Samoa     | gi 452170853 gb GAFF01010732.1                                                                                                                                                                  |
| KatG  | D A.hyacinthus SymKatG1<br>GAFF1022639  | D  | N/A      | <i>Acropora hyacinthus</i>        | American Samoa     | gi 452158946 gb GAFF01022639.1                                                                                                                                                                  |
| *KatG | E CCMP421 SymKatG1 KJ672510             | E  | CCMP421  | free-living                       | New Zealand        | GenBank KJ672510                                                                                                                                                                                |
| *KatG | F1 Mv SymKatG1 KJ672509                 | F1 | Mv       | <i>Montipora capitata</i>         | Hawai'i            | GenBank KJ672509                                                                                                                                                                                |
| KatG  | A1 Casskb8 SymKatG2 _c15386             | A1 | Casskb8  | <i>Cassiopea<br/>xamachana</i>    | Hawai'i            | kb8_c15386                                                                                                                                                                                      |
| KatG  | A1 CCMP2467 SymKatG2<br>Assembly2       | A1 | CCMP2467 | <i>Stylophora pistillata</i>      | Red Sea            | gi 556242872 gb GAKY01157826.1 <br><br>gi 556242873 gb GAKY01157825.1 <br>gi 556374816 gb GAKY01042285.1 <br>gi 556374818 gb GAKY01042284.1                                                     |
| KatG  | B1 Mf1.05b SymKatG2 c_32035             | B1 | Mf1.05b  | <i>Orbicella faveolata</i>        | Florida Keys       | mf105_c32035                                                                                                                                                                                    |
| KatG  | D A.hyacinthus SymKatG2<br>GAFF01010883 | D  | N/A      | <i>Acropora hyacinthus</i>        | American Samoa     | gi 452170702 gb GAFF01010883.1                                                                                                                                                                  |
