# Supplementary material for: Transcriptomic characterization of the enzymatic antioxidants FeSOD, MnSOD, APX and KatG in the dinoflagellate genus Symbiodinium
Source: BMC Evol Biol. 2015 Mar 18;15:48. doi: 10.1186/s12862-015-0326-0 (PMC4416395; doi:10.1186/s12862-015-0326-0)
Supplement: Additional file 1: — SOD pairwise amino acid identities. Pairwise amino acid sequence identities of MnSOD (#1-21) and FeSOD (#22-25) sequences from different Symbiodinium ITS2 types based on the alignment in Figure 1. Pairwise identities between full length sequences (green) and pairwise identities within clade C (yellow) have been highlighted. [file 12862_2015_326_MOESM1_ESM.pdf]

|                                       |    |   |     | B1 Ap1 SymMnSOD1 |     |                      |     |     |     | B1 Mf1.05b SymMnSOD1 Assembly2 |     |     |      |      |      | C1 CCMP2466 SymMnSOD1 |     |      |      |     |      | C3 Mp SymMnSOD1 AH154358 |     |     |     |     |      | C3 A.aspera SymMnSOD1 FE866047 |    |    |    |    |  | C15 M.digitata SymMnSOD1 |  |  |  |  |  | B1 Mf1.05b SymMnSOD2 Assembly1 |  |  |  |  |  | B1 Mf1.05b SymMnSOD2 rep_c13368 |  |  |  |  |  | D A.hyacinthus SymMnSOD2 GAFF01017905 |  |  |  |  |  | F1 CCMP2468 SymMnSOD2 Assembly1 |  |  |  |  |  | A1 Casskb8 SymMnSOD3 rep_c4192 |  |  |  |  |  | A1 CCMP2467 SymMnSOD3 Assembly2 |  |  |  |  |  | A1 CCMP2467 SymMnSOD3 Assembly6 |  |  |  |  |  | B1 Mf1.05b SymMnSOD3_c19510 |  |  |  |  |  | D A.hyacinthus SymMnSOD3 GAFF01006955 |  |  |  |  |  | A1 Casskb8 MnSOD rep_c710 |  |  |  |  |  | A1 CCMP2467 MnSOD Assembly4 |  |  |  |  |  | A1 CCMP2467 MnSOD Assembly3 |  |  |  |  |  | A1 Casskb8 MnSOD_c18645 |  |  |  |  |  | A1 CCMP2467 MnSOD Assembly1 |  |  |  |  |  | B1 Mf1.05b MnSOD_c29099 |  |  |  |  |  | A PF-2005 SymFeSOD AY916504 |  |  |  |  |  | B1 Ap1 SymFeSOD KJ672519 |  |  |  |  |  | E CCMP421 SymFeSOD KJ672517 |  |  |  |  |  | F1 Mv SymFeSOD KJ672518 |  |  |  |  |  |
|---------------------------------------|----|---|-----|------------------|-----|----------------------|-----|-----|-----|--------------------------------|-----|-----|------|------|------|-----------------------|-----|------|------|-----|------|--------------------------|-----|-----|-----|-----|------|--------------------------------|----|----|----|----|--|--------------------------|--|--|--|--|--|--------------------------------|--|--|--|--|--|---------------------------------|--|--|--|--|--|---------------------------------------|--|--|--|--|--|---------------------------------|--|--|--|--|--|--------------------------------|--|--|--|--|--|---------------------------------|--|--|--|--|--|---------------------------------|--|--|--|--|--|-----------------------------|--|--|--|--|--|---------------------------------------|--|--|--|--|--|---------------------------|--|--|--|--|--|-----------------------------|--|--|--|--|--|-----------------------------|--|--|--|--|--|-------------------------|--|--|--|--|--|-----------------------------|--|--|--|--|--|-------------------------|--|--|--|--|--|-----------------------------|--|--|--|--|--|--------------------------|--|--|--|--|--|-----------------------------|--|--|--|--|--|-------------------------|--|--|--|--|--|
|                                       |    |   |     | Full length      |     | Ungapped length [aa] |     | 1   | 2   | 3                              | 4   | 5   | 6    | 7    | 8    | 9                     | 10  | 11   | 12   | 13  | 14   | 15                       | 16  | 17  | 18  | 19  | 20   | 21                             | 22 | 23 | 24 | 25 |  |                          |  |  |  |  |  |                                |  |  |  |  |  |                                 |  |  |  |  |  |                                       |  |  |  |  |  |                                 |  |  |  |  |  |                                |  |  |  |  |  |                                 |  |  |  |  |  |                                 |  |  |  |  |  |                             |  |  |  |  |  |                                       |  |  |  |  |  |                           |  |  |  |  |  |                             |  |  |  |  |  |                             |  |  |  |  |  |                         |  |  |  |  |  |                             |  |  |  |  |  |                         |  |  |  |  |  |                             |  |  |  |  |  |                          |  |  |  |  |  |                             |  |  |  |  |  |                         |  |  |  |  |  |
|                                       |    |   |     | 261              | 265 | 263                  | 265 | 105 | 265 | 299                            | 303 | 294 | 297  | 246  | 173  | 86                    | 86  | 247  | 270  | 189 | 80   | 281                      | 193 | 148 | 201 | 148 | 149  | 132                            |    |    |    |    |  |                          |  |  |  |  |  |                                |  |  |  |  |  |                                 |  |  |  |  |  |                                       |  |  |  |  |  |                                 |  |  |  |  |  |                                |  |  |  |  |  |                                 |  |  |  |  |  |                                 |  |  |  |  |  |                             |  |  |  |  |  |                                       |  |  |  |  |  |                           |  |  |  |  |  |                             |  |  |  |  |  |                             |  |  |  |  |  |                         |  |  |  |  |  |                             |  |  |  |  |  |                         |  |  |  |  |  |                             |  |  |  |  |  |                          |  |  |  |  |  |                             |  |  |  |  |  |                         |  |  |  |  |  |
| B1 Ap1 SymMnSOD1 KJ672521             | 1  |   | 261 | 99%              | 92% | 94%                  | 92% | 93% | 96% | 96%                            | 85% | 93% | 49%  | 35%  | 60%  | 60%                   | 44% | 79%  | 76%  | 87% | 83%  | 81%                      | 41% |     |     |     |      |                                |    |    |    |    |  |                          |  |  |  |  |  |                                |  |  |  |  |  |                                 |  |  |  |  |  |                                       |  |  |  |  |  |                                 |  |  |  |  |  |                                |  |  |  |  |  |                                 |  |  |  |  |  |                                 |  |  |  |  |  |                             |  |  |  |  |  |                                       |  |  |  |  |  |                           |  |  |  |  |  |                             |  |  |  |  |  |                             |  |  |  |  |  |                         |  |  |  |  |  |                             |  |  |  |  |  |                         |  |  |  |  |  |                             |  |  |  |  |  |                          |  |  |  |  |  |                             |  |  |  |  |  |                         |  |  |  |  |  |
| B1 Mf1.05b SymMnSOD1 Assembly2        | 2  | Y | 265 | 99%              | 91% | 93%                  | 93% | 93% | 95% | 95%                            | 84% | 92% | 48%  | 35%  | 57%  | 57%                   | 44% | 79%  | 76%  | 86% | 82%  | 80%                      | 41% |     |     |     |      |                                |    |    |    |    |  |                          |  |  |  |  |  |                                |  |  |  |  |  |                                 |  |  |  |  |  |                                       |  |  |  |  |  |                                 |  |  |  |  |  |                                |  |  |  |  |  |                                 |  |  |  |  |  |                                 |  |  |  |  |  |                             |  |  |  |  |  |                                       |  |  |  |  |  |                           |  |  |  |  |  |                             |  |  |  |  |  |                             |  |  |  |  |  |                         |  |  |  |  |  |                             |  |  |  |  |  |                         |  |  |  |  |  |                             |  |  |  |  |  |                          |  |  |  |  |  |                             |  |  |  |  |  |                         |  |  |  |  |  |
| C1 CCMP2466 SymMnSOD1 AH154358        | 3  | Y | 263 | 92%              | 91% | 96%                  | 97% | 96% | 94% | 94%                            | 86% | 94% | 49%  | 35%  | 60%  | 60%                   | 45% | 80%  | 76%  | 89% | 84%  | 80%                      | 40% |     |     |     |      |                                |    |    |    |    |  |                          |  |  |  |  |  |                                |  |  |  |  |  |                                 |  |  |  |  |  |                                       |  |  |  |  |  |                                 |  |  |  |  |  |                                |  |  |  |  |  |                                 |  |  |  |  |  |                                 |  |  |  |  |  |                             |  |  |  |  |  |                                       |  |  |  |  |  |                           |  |  |  |  |  |                             |  |  |  |  |  |                             |  |  |  |  |  |                         |  |  |  |  |  |                             |  |  |  |  |  |                         |  |  |  |  |  |                             |  |  |  |  |  |                          |  |  |  |  |  |                             |  |  |  |  |  |                         |  |  |  |  |  |
| C3 Mp SymMnSOD1 KJ672520              | 4  | Y | 265 | 94%              | 93% | 96%                  | 98% | 97% | 95% | 95%                            | 87% | 96% | 49%  | 35%  | 59%  | 59%                   | 45% | 80%  | 77%  | 86% | 84%  | 81%                      | 41% |     |     |     |      |                                |    |    |    |    |  |                          |  |  |  |  |  |                                |  |  |  |  |  |                                 |  |  |  |  |  |                                       |  |  |  |  |  |                                 |  |  |  |  |  |                                |  |  |  |  |  |                                 |  |  |  |  |  |                                 |  |  |  |  |  |                             |  |  |  |  |  |                                       |  |  |  |  |  |                           |  |  |  |  |  |                             |  |  |  |  |  |                             |  |  |  |  |  |                         |  |  |  |  |  |                             |  |  |  |  |  |                         |  |  |  |  |  |                             |  |  |  |  |  |                          |  |  |  |  |  |                             |  |  |  |  |  |                         |  |  |  |  |  |
| C3 A.aspera SymMnSOD1 FE866047        | 5  |   | 105 | 92%              | 93% | 97%                  | 98% | 96% | 93% | 93%                            | 93% | 95% | 55%  | 29%  | 59%  | 59%                   | 52% | 89%  | 96%  | 86% | 89%  | 87%                      | 41% |     |     |     |      |                                |    |    |    |    |  |                          |  |  |  |  |  |                                |  |  |  |  |  |                                 |  |  |  |  |  |                                       |  |  |  |  |  |                                 |  |  |  |  |  |                                |  |  |  |  |  |                                 |  |  |  |  |  |                                 |  |  |  |  |  |                             |  |  |  |  |  |                                       |  |  |  |  |  |                           |  |  |  |  |  |                             |  |  |  |  |  |                             |  |  |  |  |  |                         |  |  |  |  |  |                             |  |  |  |  |  |                         |  |  |  |  |  |                             |  |  |  |  |  |                          |  |  |  |  |  |                             |  |  |  |  |  |                         |  |  |  |  |  |
| C15 M.digitata SymMnSOD1 KJ672522     | 6  | Y | 265 | 93%              | 93% | 96%                  | 97% | 96% | 95% | 95%                            | 90% | 96% | 49%  | 36%  | 59%  | 59%                   | 45% | 81%  | 77%  | 88% | 85%  | 82%                      | 41% |     |     |     |      |                                |    |    |    |    |  |                          |  |  |  |  |  |                                |  |  |  |  |  |                                 |  |  |  |  |  |                                       |  |  |  |  |  |                                 |  |  |  |  |  |                                |  |  |  |  |  |                                 |  |  |  |  |  |                                 |  |  |  |  |  |                             |  |  |  |  |  |                                       |  |  |  |  |  |                           |  |  |  |  |  |                             |  |  |  |  |  |                             |  |  |  |  |  |                         |  |  |  |  |  |                             |  |  |  |  |  |                         |  |  |  |  |  |                             |  |  |  |  |  |                          |  |  |  |  |  |                             |  |  |  |  |  |                         |  |  |  |  |  |
| B1 Mf1.05b SymMnSOD2 Assembly1        | 7  | Y | 299 | 96%              | 95% | 94%                  | 95% | 93% | 95% | 97%                            | 88% | 95% | 47%  | 35%  | 52%  | 52%                   | 43% | 81%  | 78%  | 88% | 85%  | 82%                      | 40% |     |     |     |      |                                |    |    |    |    |  |                          |  |  |  |  |  |                                |  |  |  |  |  |                                 |  |  |  |  |  |                                       |  |  |  |  |  |                                 |  |  |  |  |  |                                |  |  |  |  |  |                                 |  |  |  |  |  |                                 |  |  |  |  |  |                             |  |  |  |  |  |                                       |  |  |  |  |  |                           |  |  |  |  |  |                             |  |  |  |  |  |                             |  |  |  |  |  |                         |  |  |  |  |  |                             |  |  |  |  |  |                         |  |  |  |  |  |                             |  |  |  |  |  |                          |  |  |  |  |  |                             |  |  |  |  |  |                         |  |  |  |  |  |
| B1 Mf1.05b SymMnSOD2 rep_c13368       | 8  | Y | 303 | 96%              | 95% | 94%                  | 95% | 93% | 95% | 97%                            | 87% | 93% | 47%  | 35%  | 52%  | 52%                   | 43% | 81%  | 77%  | 88% | 85%  | 82%                      | 40% |     |     |     |      |                                |    |    |    |    |  |                          |  |  |  |  |  |                                |  |  |  |  |  |                                 |  |  |  |  |  |                                       |  |  |  |  |  |                                 |  |  |  |  |  |                                |  |  |  |  |  |                                 |  |  |  |  |  |                                 |  |  |  |  |  |                             |  |  |  |  |  |                                       |  |  |  |  |  |                           |  |  |  |  |  |                             |  |  |  |  |  |                             |  |  |  |  |  |                         |  |  |  |  |  |                             |  |  |  |  |  |                         |  |  |  |  |  |                             |  |  |  |  |  |                          |  |  |  |  |  |                             |  |  |  |  |  |                         |  |  |  |  |  |
| D A.hyacinthus SymMnSOD2 GAFF01017905 | 9  | Y | 294 | 85%              | 84% | 86%                  | 87% | 93% | 90% | 88%                            | 87% | 89% | 47%  | 35%  | 52%  | 52%                   | 43% | 82%  | 78%  | 89% | 84%  | 81%                      | 41% |     |     |     |      |                                |    |    |    |    |  |                          |  |  |  |  |  |                                |  |  |  |  |  |                                 |  |  |  |  |  |                                       |  |  |  |  |  |                                 |  |  |  |  |  |                                |  |  |  |  |  |                                 |  |  |  |  |  |                                 |  |  |  |  |  |                             |  |  |  |  |  |                                       |  |  |  |  |  |                           |  |  |  |  |  |                             |  |  |  |  |  |                             |  |  |  |  |  |                         |  |  |  |  |  |                             |  |  |  |  |  |                         |  |  |  |  |  |                             |  |  |  |  |  |                          |  |  |  |  |  |                             |  |  |  |  |  |                         |  |  |  |  |  |
| F1 CCMP2468 SymMnSOD2 Assembly1       | 10 | Y | 297 | 93%              | 92% | 94%                  | 96% | 95% | 96% | 95%                            | 93% | 89% | 47%  | 35%  | 53%  | 53%                   | 43% | 80%  | 77%  | 88% | 85%  | 83%                      | 40% |     |     |     |      |                                |    |    |    |    |  |                          |  |  |  |  |  |                                |  |  |  |  |  |                                 |  |  |  |  |  |                                       |  |  |  |  |  |                                 |  |  |  |  |  |                                |  |  |  |  |  |                                 |  |  |  |  |  |                                 |  |  |  |  |  |                             |  |  |  |  |  |                                       |  |  |  |  |  |                           |  |  |  |  |  |                             |  |  |  |  |  |                             |  |  |  |  |  |                         |  |  |  |  |  |                             |  |  |  |  |  |                         |  |  |  |  |  |                             |  |  |  |  |  |                          |  |  |  |  |  |                             |  |  |  |  |  |                         |  |  |  |  |  |
| A1 Casskb8 SymMnSOD3 rep_c4192        | 11 | Y | 246 | 49%              | 48% | 49%                  | 49% | 55% | 49% | 47%                            | 47% | 47% | 76%  | 100% | 100% | 73%                   | 49% | 43%  | 61%  | 48% | 46%  | 66%                      |     |     |     |     |      |                                |    |    |    |    |  |                          |  |  |  |  |  |                                |  |  |  |  |  |                                 |  |  |  |  |  |                                       |  |  |  |  |  |                                 |  |  |  |  |  |                                |  |  |  |  |  |                                 |  |  |  |  |  |                                 |  |  |  |  |  |                             |  |  |  |  |  |                                       |  |  |  |  |  |                           |  |  |  |  |  |                             |  |  |  |  |  |                             |  |  |  |  |  |                         |  |  |  |  |  |                             |  |  |  |  |  |                         |  |  |  |  |  |                             |  |  |  |  |  |                          |  |  |  |  |  |                             |  |  |  |  |  |                         |  |  |  |  |  |
| A1 CCMP2467 SymMnSOD3 Assembly2       | 12 |   | 173 | 35%              | 35% | 35%                  | 35% | 29% | 36% | 35%                            | 35% | 35% | 76%  | 43%  | 43%  | 53%                   | 36% | 39%  | 28%  | 37% | 42%  | 61%                      |     |     |     |     |      |                                |    |    |    |    |  |                          |  |  |  |  |  |                                |  |  |  |  |  |                                 |  |  |  |  |  |                                       |  |  |  |  |  |                                 |  |  |  |  |  |                                |  |  |  |  |  |                                 |  |  |  |  |  |                                 |  |  |  |  |  |                             |  |  |  |  |  |                                       |  |  |  |  |  |                           |  |  |  |  |  |                             |  |  |  |  |  |                             |  |  |  |  |  |                         |  |  |  |  |  |                             |  |  |  |  |  |                         |  |  |  |  |  |                             |  |  |  |  |  |                          |  |  |  |  |  |                             |  |  |  |  |  |                         |  |  |  |  |  |
| A1 CCMP2467 SymMnSOD3 Assembly6       | 13 |   | 86  | 60%              | 57% | 60%                  | 59% | 59% | 59% | 52%                            | 52% | 53% | 100% | 43%  | 100% | 92%                   | 63% | N/A  | 63%  | 51% | N/A  | N/A                      |     |     |     |     |      |                                |    |    |    |    |  |                          |  |  |  |  |  |                                |  |  |  |  |  |                                 |  |  |  |  |  |                                       |  |  |  |  |  |                                 |  |  |  |  |  |                                |  |  |  |  |  |                                 |  |  |  |  |  |                                 |  |  |  |  |  |                             |  |  |  |  |  |                                       |  |  |  |  |  |                           |  |  |  |  |  |                             |  |  |  |  |  |                             |  |  |  |  |  |                         |  |  |  |  |  |                             |  |  |  |  |  |                         |  |  |  |  |  |                             |  |  |  |  |  |                          |  |  |  |  |  |                             |  |  |  |  |  |                         |  |  |  |  |  |
| B1 Mf1.05b SymMnSOD3_c19510           | 14 |   | 86  | 60%              | 57% | 60%                  | 59% | 59% | 59% | 52%                            | 52% | 53% | 100% | 43%  | 100% | 92%                   | 63% | N/A  | 63%  | 51% | N/A  | N/A                      |     |     |     |     |      |                                |    |    |    |    |  |                          |  |  |  |  |  |                                |  |  |  |  |  |                                 |  |  |  |  |  |                                       |  |  |  |  |  |                                 |  |  |  |  |  |                                |  |  |  |  |  |                                 |  |  |  |  |  |                                 |  |  |  |  |  |                             |  |  |  |  |  |                                       |  |  |  |  |  |                           |  |  |  |  |  |                             |  |  |  |  |  |                             |  |  |  |  |  |                         |  |  |  |  |  |                             |  |  |  |  |  |                         |  |  |  |  |  |                             |  |  |  |  |  |                          |  |  |  |  |  |                             |  |  |  |  |  |                         |  |  |  |  |  |
| D A.hyacinthus SymMnSOD3 GAFF01006955 | 15 | Y | 247 | 44%              | 44% | 45%                  | 45% | 52% | 45% | 43%                            | 43% | 43% | 73%  | 53%  | 92%  | 92%                   | 47% | 42%  | 58%  | 44% | 43%  | 70%                      |     |     |     |     |      |                                |    |    |    |    |  |                          |  |  |  |  |  |                                |  |  |  |  |  |                                 |  |  |  |  |  |                                       |  |  |  |  |  |                                 |  |  |  |  |  |                                |  |  |  |  |  |                                 |  |  |  |  |  |                                 |  |  |  |  |  |                             |  |  |  |  |  |                                       |  |  |  |  |  |                           |  |  |  |  |  |                             |  |  |  |  |  |                             |  |  |  |  |  |                         |  |  |  |  |  |                             |  |  |  |  |  |                         |  |  |  |  |  |                             |  |  |  |  |  |                          |  |  |  |  |  |                             |  |  |  |  |  |                         |  |  |  |  |  |
| A1 Casskb8 MnSOD rep_c710             | 16 | Y | 270 | 79%              | 79% | 80%                  | 80% | 89% | 81% | 81%                            | 81% | 82% | 49%  | 36%  | 63%  | 63%                   | 47% | 100% | 100% | 82% | 80%  | 41%                      |     |     |     |     |      |                                |    |    |    |    |  |                          |  |  |  |  |  |                                |  |  |  |  |  |                                 |  |  |  |  |  |                                       |  |  |  |  |  |                                 |  |  |  |  |  |                                |  |  |  |  |  |                                 |  |  |  |  |  |                                 |  |  |  |  |  |                             |  |  |  |  |  |                                       |  |  |  |  |  |                           |  |  |  |  |  |                             |  |  |  |  |  |                             |  |  |  |  |  |                         |  |  |  |  |  |                             |  |  |  |  |  |                         |  |  |  |  |  |                             |  |  |  |  |  |                          |  |  |  |  |  |                             |  |  |  |  |  |                         |  |  |  |  |  |
| A1 CCMP2467 MnSOD Assembly4           | 17 |   | 189 | 76%              | 76% | 76%                  | 77% | 96% | 77% | 78%                            | 77% | 77% | 43%  | 39%  | N/A  | N/A                   | 42% | 100% | N/A  | 80% | 80%  | 41%                      |     |     |     |     |      |                                |    |    |    |    |  |                          |  |  |  |  |  |                                |  |  |  |  |  |                                 |  |  |  |  |  |                                       |  |  |  |  |  |                                 |  |  |  |  |  |                                |  |  |  |  |  |                                 |  |  |  |  |  |                                 |  |  |  |  |  |                             |  |  |  |  |  |                                       |  |  |  |  |  |                           |  |  |  |  |  |                             |  |  |  |  |  |                             |  |  |  |  |  |                         |  |  |  |  |  |                             |  |  |  |  |  |                         |  |  |  |  |  |                             |  |  |  |  |  |                          |  |  |  |  |  |                             |  |  |  |  |  |                         |  |  |  |  |  |
| A1 CCMP2467 MnSOD Assembly3           | 18 |   | 80  | 87%              | 86% | 89%                  | 86% | 86% | 88% | 88%                            | 88% | 88% | 61%  | 28%  | 63%  | 63%                   | 58% | 100% | N/A  | 86% | 80%  | N/A                      |     |     |     |     |      |                                |    |    |    |    |  |                          |  |  |  |  |  |                                |  |  |  |  |  |                                 |  |  |  |  |  |                                       |  |  |  |  |  |                                 |  |  |  |  |  |                                |  |  |  |  |  |                                 |  |  |  |  |  |                                 |  |  |  |  |  |                             |  |  |  |  |  |                                       |  |  |  |  |  |                           |  |  |  |  |  |                             |  |  |  |  |  |                             |  |  |  |  |  |                         |  |  |  |  |  |                             |  |  |  |  |  |                         |  |  |  |  |  |                             |  |  |  |  |  |                          |  |  |  |  |  |                             |  |  |  |  |  |                         |  |  |  |  |  |
| A1 Casskb8 MnSOD_c18645               | 19 |   | 281 | 83%              | 82% | 84%                  | 84% | 89% | 85% | 85%                            | 85% | 84% | 48%  | 37%  | 51%  | 51%                   | 44% | 82%  | 80%  | 86% | 100% | 43%                      |     |     |     |     |      |                                |    |    |    |    |  |                          |  |  |  |  |  |                                |  |  |  |  |  |                                 |  |  |  |  |  |                                       |  |  |  |  |  |                                 |  |  |  |  |  |                                |  |  |  |  |  |                                 |  |  |  |  |  |                                 |  |  |  |  |  |                             |  |  |  |  |  |                                       |  |  |  |  |  |                           |  |  |  |  |  |                             |  |  |  |  |  |                             |  |  |  |  |  |                         |  |  |  |  |  |                             |  |  |  |  |  |                         |  |  |  |  |  |                             |  |  |  |  |  |                          |  |  |  |  |  |                             |  |  |  |  |  |                         |  |  |  |  |  |
| A1 CCMP2467 MnSOD Assembly1           | 20 |   | 193 | 81%              | 80% | 80%                  | 81% | 87% | 82% | 82%                            | 81% | 83% | 46%  | 42%  | N/A  | N/A                   | 43% | 80%  | 80%  | 80% | 100% | 43%                      |     |     |     |     |      |                                |    |    |    |    |  |                          |  |  |  |  |  |                                |  |  |  |  |  |                                 |  |  |  |  |  |                                       |  |  |  |  |  |                                 |  |  |  |  |  |                                |  |  |  |  |  |                                 |  |  |  |  |  |                                 |  |  |  |  |  |                             |  |  |  |  |  |                                       |  |  |  |  |  |                           |  |  |  |  |  |                             |  |  |  |  |  |                             |  |  |  |  |  |                         |  |  |  |  |  |                             |  |  |  |  |  |                         |  |  |  |  |  |                             |  |  |  |  |  |                          |  |  |  |  |  |                             |  |  |  |  |  |                         |  |  |  |  |  |
| B1 Mf1.05b MnSOD_c29099               | 21 |   | 148 | 41%              | 41% | 40%                  | 41% | 41% | 40% | 40%                            | 41% | 40% | 66%  | 61%  | N/A  | N/A                   | 70% | 41%  | 41%  | N/A | 43%  | 43%                      |     |     |     |     |      |                                |    |    |    |    |  |                          |  |  |  |  |  |                                |  |  |  |  |  |                                 |  |  |  |  |  |                                       |  |  |  |  |  |                                 |  |  |  |  |  |                                |  |  |  |  |  |                                 |  |  |  |  |  |                                 |  |  |  |  |  |                             |  |  |  |  |  |                                       |  |  |  |  |  |                           |  |  |  |  |  |                             |  |  |  |  |  |                             |  |  |  |  |  |                         |  |  |  |  |  |                             |  |  |  |  |  |                         |  |  |  |  |  |                             |  |  |  |  |  |                          |  |  |  |  |  |                             |  |  |  |  |  |                         |  |  |  |  |  |
| A PF-2005 SymFeSOD AY916504           | 22 | Y | 201 |                  |     |                      |     |     |     |                                |     |     |      |      |      |                       |     |      |      |     |      |                          |     |     |     | 95% | 94%  | 95%                            |    |    |    |    |  |                          |  |  |  |  |  |                                |  |  |  |  |  |                                 |  |  |  |  |  |                                       |  |  |  |  |  |                                 |  |  |  |  |  |                                |  |  |  |  |  |                                 |  |  |  |  |  |                                 |  |  |  |  |  |                             |  |  |  |  |  |                                       |  |  |  |  |  |                           |  |  |  |  |  |                             |  |  |  |  |  |                             |  |  |  |  |  |                         |  |  |  |  |  |                             |  |  |  |  |  |                         |  |  |  |  |  |                             |  |  |  |  |  |                          |  |  |  |  |  |                             |  |  |  |  |  |                         |  |  |  |  |  |
| B1 Ap1 SymFeSOD KJ672519              | 23 |   | 148 |                  |     |                      |     |     |     |                                |     |     |      |      |      |                       |     |      |      |     |      |                          |     |     | 95% |     | 96%  | 96%                            |    |    |    |    |  |                          |  |  |  |  |  |                                |  |  |  |  |  |                                 |  |  |  |  |  |                                       |  |  |  |  |  |                                 |  |  |  |  |  |                                |  |  |  |  |  |                                 |  |  |  |  |  |                                 |  |  |  |  |  |                             |  |  |  |  |  |                                       |  |  |  |  |  |                           |  |  |  |  |  |                             |  |  |  |  |  |                             |  |  |  |  |  |                         |  |  |  |  |  |                             |  |  |  |  |  |                         |  |  |  |  |  |                             |  |  |  |  |  |                          |  |  |  |  |  |                             |  |  |  |  |  |                         |  |  |  |  |  |
| E CCMP421 SymFeSOD KJ672517           | 24 |   | 149 |                  |     |                      |     |     |     |                                |     |     |      |      |      |                       |     |      |      |     |      |                          |     |     | 94% | 96% |      | 100%                           |    |    |    |    |  |                          |  |  |  |  |  |                                |  |  |  |  |  |                                 |  |  |  |  |  |                                       |  |  |  |  |  |                                 |  |  |  |  |  |                                |  |  |  |  |  |                                 |  |  |  |  |  |                                 |  |  |  |  |  |                             |  |  |  |  |  |                                       |  |  |  |  |  |                           |  |  |  |  |  |                             |  |  |  |  |  |                             |  |  |  |  |  |                         |  |  |  |  |  |                             |  |  |  |  |  |                         |  |  |  |  |  |                             |  |  |  |  |  |                          |  |  |  |  |  |                             |  |  |  |  |  |                         |  |  |  |  |  |
| F1 Mv SymFeSOD KJ672518               | 25 |   | 132 |                  |     |                      |     |     |     |                                |     |     |      |      |      |                       |     |      |      |     |      |                          |     |     | 95% | 96% | 100% |                                |    |    |    |    |  |                          |  |  |  |  |  |                                |  |  |  |  |  |                                 |  |  |  |  |  |                                       |  |  |  |  |  |                                 |  |  |  |  |  |                                |  |  |  |  |  |                                 |  |  |  |  |  |                                 |  |  |  |  |  |                             |  |  |  |  |  |                                       |  |  |  |  |  |                           |  |  |  |  |  |                             |  |  |  |  |  |                             |  |  |  |  |  |                         |  |  |  |  |  |                             |  |  |  |  |  |                         |  |  |  |  |  |                             |  |  |  |  |  |                          |  |  |  |  |  |                             |  |  |  |  |  |                         |  |  |  |  |  |
