# Supplementary material for: Transcriptomic characterization of the enzymatic antioxidants FeSOD, MnSOD, APX and KatG in the dinoflagellate genus Symbiodinium
Source: BMC Evol Biol. 2015 Mar 18;15:48. doi: 10.1186/s12862-015-0326-0 (PMC4416395; doi:10.1186/s12862-015-0326-0)
Supplement: Additional file 2: — MnSOD signal peptide location. Location of signal peptide (magenta) and ancient transit peptide motif (red) in the N-terminal region of MnSOD sequences from different Symbiodinium ITS2 types. Sequence IDs consist of ITS2 type, strain designation or source of isolation (in brackets), MnSOD isoform and NCBI accession number or contig/assembly designation (Additional file 11). [file 12862_2015_326_MOESM2_ESM.pdf]

## Consensus Identity

1 10 20 30 40 50 60 70 80 90  
M A X R R X R X X X A L X X X X X X X X X X C X X X X F X X P X X X X X X X X X X X X X X X X X X X X X X X L P X L P Y X Y D A L E P X I D X X T M X X H H X K H H

1. B1 (Ap1) SymMnSOD1 KJ672521
2. B1 (Mf1.05b) SymMnSOD1 Assembly2
3. C1 (CCMP2466) SymMnSOD1 AH154358
4. C3 (Mp) SymMnSOD1 KJ672520
5. C3 (A.aspera) SymMnSOD1 FE866047
6. C15 (M.digitata) SymMnSOD1 KJ672522
7. B1 (Mf1.05b) SymMnSOD2 Assembly1
8. B1 (Mf1.05b) SymMnSOD2 rep\_c13368
9. D (A.hyacinthus) SymMnSOD2 GFP01017905
10. F1 (CCMP2468) SymMnSOD2 Assembly1
11. A1 (Casskb8) SymMnSOD3 rep\_c4192
12. A1 (CCMP2467) SymMnSOD3 Assembly2
13. A1 (CCMP2467) SymMnSOD3 Assembly6
14. B1 (Mf1.05b) SymMnSOD3\_c19510
15. D (A.hyacinthus) SymMnSOD3 GFP01006955
16. A1 (Casskb8) MnSOD rep\_c710
17. A1 (CCMP2467) MnSOD Assembly4
18. A1 (CCMP2467) MnSOD Assembly3
19. A1 (Casskb8) MnSOD\_c18645
20. A1 (CCMP2467) MnSOD Assembly1
21. B1 (Mf1.05b) MnSOD\_c29099

|                       |           |          |      |        |       |                       |                        |                                 |                                 |
|-----------------------|-----------|----------|------|--------|-------|-----------------------|------------------------|---------------------------------|---------------------------------|
| MAPRRFRGAAALVVGAMLVLC | ----      | CLERG    | FVSP | TNAT   | ---   | RRNLAAGFASGLAGVLGLES  | AQAYDLPDLPYAYDALEPS    | IDKATMEFHHDKHH                  |                                 |
| MAPRRFRGAAALVVGAMLVLC | ----      | CLERG    | FVSP | TNAT   | ---   | RRNLAAGFXSGLAGVLGLES  | AQAYDLPDLPYAYDALEPS    | IDKATMEFHHDKHH                  |                                 |
| MA-RR-RGAVLVLGCLLVC   | ----      | CLERG    | FVSP | TNAT   | ---   | RRSLAAGFASGLAGVLGLES  | AQAYDLPDLPYAYDALEPS    | IDKATMEFHHDKHH                  |                                 |
| MAPRRFRGAAALVVGCLLVC  | ----      | CLERG    | FVSP | TNAT   | ---   | RRSLAAGFASGLAGVLGLES  | AQAYDLPDLPYAYDALEPS    | IDKATMEFHHDKHH                  |                                 |
| MAPRRFRGAAALVVGCLLVC  | ----      | CLDCG    | FVSP | TNAT   | ---   | RRSLAAGFASGLAGVLGLES  | AQAYDLPDLPYAYDALEPS    | IDKATMEFHHDKHH                  |                                 |
| MAPRRFRGAAALVVGAMLAC  | ----      | CLERG    | FVSP | TNAT   | ---   | RRNLAAGFASGLAGVLGLES  | AQAYDLPDLPYAYDALEPS    | IDKATMEFHHDKHH                  |                                 |
| MAPRRFRSAAALVVGAMLVLC | ----      | CLERG    | FVSP | TNAT   | ---   | RRNLAAGFASGLAGVLGLES  | AQAYDLPDLPYAYDALEPS    | IDKATMEFHHDKHH                  |                                 |
| MA-RRFRG-AALLVAAMLLC  | ----      | CWHCS    | FVSP | QGAS   | ---   | RREMAAGLATGLVGLLS     | -ESARAYDLPDLPYAYDALEPS | IDKATMEFHHDKHH                  |                                 |
| MAPRRCRGAAALVVGCLLVC  | ----      | CLERG    | FVSP | SNAS   | ---   | RRTLAAAGFASGLAGVLGLES | AQAYDLPDLPYAYDALEPS    | IDKATMEFHHDKHH                  |                                 |
|                       |           |          |      |        |       | MLGLRCWLVS            | --LVASGVHAGDV          | FTLPAALPYEYDALEPHIDAETMKIHHGKHH |                                 |
|                       |           |          |      |        |       | MLGLRCWLVS            | --LVASGVHAGDV          | FTLPAALPYEYDALEPHIDAETMKIHHGKHH |                                 |
|                       |           |          |      |        |       | MWFHVP                | TSAMAA--MALWVGAA       | GEI                             | FSLPAALPYEYDALEPYIDEQTMRIHHGKHH |
| MA-RRVRGV             | SALVVAALV | LVVAARQC | MDLC | FVTP   | GAGSS | -TRRGVATT             | VATGLASLIGLES          | AKAYDLPDLPYAYDALEPS             | IDKATMEFHHDKHH                  |
| MA-RRVRGV             | SALVVAALV | LVVAARQC | MDLC | FVTP   | GAGSS | -TRRGVATT             | VATGLASLIGLES          | AKAYDLPDLPYAYDALEPS             | IDKATMEFHHDKHH                  |
| MA-RRVRGILALAVAAALVW  | ---       | QCVDLA   | FLTP | APESAP | TRRH  | LAAGLASGLAGLVGLES     | AQAYDLPDLPYAYDALEPS    | IDKATMEFHHDKHH                  |                                 |
| MA-RRVRGILALAVAAALVW  | ---       | QCVDLA   | FLTP | APESAP | TRRH  | LAAGLASGLAGLVGLES     | AQAYDLPDLPYAYDALEPS    | IDKATMEFHHDKHH                  |                                 |
|                       |           |          |      |        |       | MR--VVWLVA            | --MVQ--LVKGDI          | FSLPAALPYEYDALEPYIDEQTMRIHHEKHH |                                 |
