# Supplementary material for: Transcriptomic characterization of the enzymatic antioxidants FeSOD, MnSOD, APX and KatG in the dinoflagellate genus Symbiodinium
Source: BMC Evol Biol. 2015 Mar 18;15:48. doi: 10.1186/s12862-015-0326-0 (PMC4416395; doi:10.1186/s12862-015-0326-0)
Supplement: Additional file 6: — KatG signal peptide location. Location of signal peptide (magenta) and transmembrane domains (red) in the N-terminal region of KatG sequences from different Symbiodinium ITS2 types. Sequence IDs consist of ITS2 type, strain designation or source of isolation (in brackets), APX isoform and NCBI accession number or contig/assembly designation (Additional file 11). [file 12862_2015_326_MOESM6_ESM.pdf]

## Consensus Identity

[illegible]

1. A1 (Casskb8) SymKatG1 Assembly2
2. A1 (CCMP2467) SymKatG1 KJ735681
3. A1 (CCMP2467) SymKatG1 Assembly3
4. A1 (CCMP2467) SymKatG1 Assembly1
5. B1 (Ap1) SymKatG1 KJ672511
6. B1 (Mf1.05b) SymKatG1 Assembly1
7. C1 (CCMP2466) SymKatG1 KF835563
8. C3 (A.aspera) SymKatG1 Assembly1
9. D (A.hyacinthus) SymKatG1 GAFF1022639
10. D (A.hyacinthus) SymKatG1 GAFF01010732
11. E (CCMP421) SymKatG1 KJ672510
12. F1 (Mv) SymKatG1 KJ672509
13. A1 (Casskb8) SymKatG2 c\_15386
14. A1 (CCMP2467) SymKatG2 Assembly2
15. B1 (Mf1.05b) SymKatG2 c\_32035
16. D (A.hyacinthus) SymKatG2 GAFF01010883

QVMSKAEYHRQLKSLDIPRLYREIAALMTSSRPYWPADGPQDQ  
MALRAAAFLLAFRA TDCLMRNDDFPFYDLGTVPAWRDLGSLRGTO SPEQFHKEEYHKQLKKLDIQQLYESITNLMTDSKPYWPADGPQDQ  
MALRAAAFLLAFRA TDCLMRNDDFPFYDLGTVPAWRDLGSLRGTO SPEQFHKEEYHKQLKKLDIQQLYESITNLMTDSKPYWPADGPQDQ  
MALRSMGFLLTFLVTEGSMRNDDFPFY Y LGTVPAWRDLGSLRGTO SPHQFDKGKYHKQLKELDIEHLYQSI SKLMKDSKAFWPADGPQDQ  
MAFRSVGFLLTFLVTEGSMRNDDFPFY Y LGTVPAWRDLGSLRGTO SPHQFDKEKYHKQLKELDIEHLYQSI SKLMKDSKAFWPADGPQDQ  
APMFLASLAATVVLSTVA QMRNDDFPFYDLGTIPAWKDLGYLRGTHAKPFDKEAYHRDLKHLDIPRLYESITKLMVSSKAFWPADGPQDQ  
ADGPQDQ  
MARKLLAFLVPGVGVA TCGPLPFTTVPENYAAVPELPVYDAALKALDLKAVVTDLQKLFVNSQDCWPADF----  
MARKLLAFLVPGVGVA TCGPLPFTTVPENYAAVPELPVYDAALKALDLKAVVTDLQKLFVNSQDCWPADF----  
MARALLLALMLRGSLS PCPGIAYSVP PQNY YVPELPVYDKSLKELDLKAVVADMQKLF LDSQECWPADW----
